# Supplementary material for: Effects of different iron minerals on organics removal pathway and end-products during anaerobic digestion
Source: Royal Society of Chemistry journal article supplement (doi:10.1039/d2ew00881e), 2023-01-01
Supplement: d2ew00881e1.pdf [file d2ew00881e1.pdf]

## **Effects of Different Iron Minerals on Organics Removal Pathway and End-Products during Anaerobic Digestion**

Yafei Yang<sup>a, b</sup>, Hezhen Chen<sup>a</sup>, Li Wang<sup>b</sup>, Yan Wang<sup>a</sup>, Junfeng Wan<sup>a\*</sup>

<sup>a</sup> School of Ecology and Environment, Zhengzhou University, Zhengzhou 450001, China

<sup>b</sup> Kweichow Moutai Co., Ltd., Renhuai, Guizhou 564501, China

\*Corresponding author: Junfeng Wan; School of Ecology and Environment, Zhengzhou University, Zhengzhou 450001, China. E-mail: wanjunfeng@zzu.edu.cn.

## Results

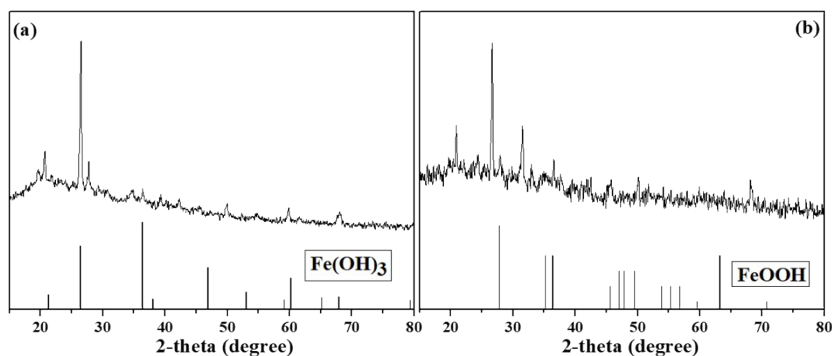

Fig.S1. (a) XRD pattern of original sludge, and (b) XRD pattern of sludge from ferrihydrite-added group on day 30

Table S1. Relative abundances of IRB in different groups

|              | <i>Clostridium</i> | <i>Trichococcus</i> | <i>Thauera</i> | <i>Rhodospirillum rubrum</i> | <i>Pseudomonas</i> |
|--------------|--------------------|---------------------|----------------|------------------------------|--------------------|
| Control      | 2.1%               | 2.8%                | 0.2%           | 0.1%                         | 0.1%               |
| Ferrihydrite | 4.8%               | 3.2%                | 0.3%           | 0.1%                         | 0.3%               |
| Magnetite    | 2.8%               | 4.3%                | 0.7%           | 0.4%                         | 0.6%               |
